# Supplementary material for: Unravelling the French National Fungal Database: Geography, Temporality, Taxonomy and Ecology of the Recorded Diversity
Source: MDPI journal article supplement (doi:10.3390/jof8090926), 2022-08-31

## **Acknowledgments**

This article is dedicated to the memory of Christian Lechat, we founded AscoFrance. The work was co-funded by AdoniF and the Observatoire de Recherche Méditerranéen de l'Environnement (OREME). We thank the Ministère de la Transition Ecologique and Julien Touroult and Pascal Dupont from the UMS PatriNat for financial support to AdoniF for the project FongiFrance. We're grateful to all contributors to FongiBase database, especially Jean-Claude Malaval, Jean-Pierre Dubus and Jean-Paul Maurice, the members of AMO (Association Mycologique de l'ouest), SMRY (Société Mycologique de la Roche sur Yon), SMF (Société Mycologique de France), FMBDS (Fédération mycologique et botanique Dauphiné-Savoie, MycofIAURA program managed by Nicolas Van Vooren), SMNF (Société Mycologique du Nord de la France), RNF (Réserves Naturelles de France), MNHN (Muséum National d'Histoire Naturelle), the University of Lille, the Conservatoire Botanique National Franche-Comté (CBNFC-ORI) and its mycological expert Daniel Sugny, AscoFrance and AdoniF.. We are indebted to Régis Courtecuisse and Alain Delannoy for having provided all the data collected during the Programme National D'Inventaire et de Cartographie des Mycota français. We are particularly grateful to Alexia Vaillé and Berangère Baldit, from the administrative support of OREME, for their technical assistance. We thank Anders Dahlberg and Gregory Mueller for enlightening discussion and advices at the early stage of the project

## **Conflicts of Interest**

The authors whose names are listed immediately below certify that they have NO affiliations with or involvement in any organization or entity with any financial interest (such as honoraria; educational grants; participation in speakers' bureaus; membership, employment, consultancies, stock ownership, or other equity interest; and expert testimony or

patentlicensing arrangements), or nonfinancial interest (such as personal or professional relationships, affiliations, knowledge or beliefs) in the subject matter or materials discussed in this manuscript.

Author names: Montan Gautier a, Pierre-Arthur Moreau b, Béatrice Boury b, Franck Richard.

## Supplementary Material

### Figure legend

**Figure S1** Attribution of four ecoregions in France by departments. The dotted line indicates the geographical limits of ecoregions without department administrative borders. The departments 75 (Paris), 92 (Hauts-de-Seine), 93 (Seine-Saint-Denis), and 94 (Val-de-Marne) are represented by a red star and they are assigned to the Atlantic ecoregion.

**Figure S2.** Taxon accumulation curve for the four clusters of records in France. The color of curves indicates the corresponding ecoregion, with brown, blue and green for montane, Atlantic and continental domains, respectively.

**Figure S3.** Distribution of taxa based on their occurrence in the database, ordered by observation classes using **A.** multiples of 100 records **B.** for taxa with less than 100 records (red bar in panel A), multiples of 10 records and **C.** for taxa with less than 10 records (red bar in panel B) detailed distribution per each frequency.

**Figure S4.** Temporal dynamics of fungal recording during the period [1800-2022] in four clusters of recording activity. The Northern cluster includes the departments of Nord, Oise, Nord-Pas-de-Calais and Seine-Maritime. The Western cluster includes the departments of Charentes, Loire-Atlantic, Mayenne, Vendée and Vienne. The Eastern cluster includes the departments of Doubs, Jura, Haute-Saône and Territoire de Belfort. The Alpine cluster includes the departments of Isère, Loire, Rhône, Savoie and Haute-Savoie.

## Supplementary Tables

**Table S1:** Identity of the 26 contributors of FongiBase with the number of deposited fungal observations and the number of one observation taxa (singletons).

| Contributor                                | Number of records | Percentage of records | Number of singletons | Proportion of singletons (in %) |
|--------------------------------------------|-------------------|-----------------------|----------------------|---------------------------------|
| ABMARS                                     | 7262              | 0.7                   | 3                    | 0.04                            |
| ADONIF                                     | 120394            | 11.9                  | 372                  | 0.31                            |
| AMO                                        | 47515             | 4.7                   | 100                  | 0.21                            |
| AscoFrance                                 | 2385              | 0.2                   | 239                  | 10.02                           |
| Amblard BD.                                | 1                 | 0.00009               | 0                    | 0                               |
| CEMA                                       | 48                | 0.005                 | 0                    | 0                               |
| Lécuri C., Moreau PA.                      | 123               | 0.01                  | 1                    | 0.81                            |
| CBNFC-ORI                                  | 177838            | 17.6                  | 37                   | 0.02                            |
| Faculté de pharmacie de Rennes             | 168               | 0.02                  | 0                    | 0                               |
| FMBDS                                      | 180358            | 17.9                  | 624                  | 0.35                            |
| GMN                                        | 1765              | 0.2                   | 3                    | 0.17                            |
| Le Pleurote Sinois                         | 5967              | 0.6                   | 0                    | 0                               |
| MNHN                                       | 155758            | 15.4                  | 173                  | 0.11                            |
| ONF                                        | 314               | 0.03                  | 0                    | 0                               |
| Aleksandrowicz P., Chabrerie O., Clowez P. | 1                 | 0.00009               | 0                    | 0                               |
| RNF                                        | 136257            | 13.5                  | 84                   | 0.06                            |
| SMCTO                                      | 7670              | 0.7                   | 0                    | 0                               |
| SMF                                        | 15061             | 1.5                   | 178                  | 1.18                            |
| SMNF                                       | 112917            | 11.2                  | 329                  | 0.29                            |
| SMP                                        | 16                | 0.002                 | 0                    | 0                               |
| SLNP                                       | 5570              | 0.6                   | 7                    | 0.13                            |
| SMRY                                       | 4272              | 0.4                   | 97                   | 2.27                            |
| SMM                                        | 1449              | 0.1                   | 0                    | 0                               |
| SMR                                        | 752               | 0.1                   | 3                    | 0.40                            |
| ULCO                                       | 33                | 0.0                   | 2                    | 6.06                            |
| UL                                         | 42001             | 4.2                   | 97                   | 0.23                            |

**Table S2:** Detail of the number of deposited fungal records in FongiBase in relation to their natural habitat of collecting according to CORINE Biotopes catalog.

| CORINE biotope code | CORINE biotope division 1                          | CORINE biotope division 2                                       | Number of records | Percentage of records |
|---------------------|----------------------------------------------------|-----------------------------------------------------------------|-------------------|-----------------------|
| 2                   | Non-marine waters                                  | Non-marine waters unclassified                                  | 104               | 0.08                  |
| 3                   | Scrub and grasslands                               | Scrub and grassland unclassified                                | 1488              | 1.21                  |
| 4                   | Forests                                            | Forests unclassified                                            | 2154              | 1.75                  |
| 5                   | Bogs and marshes                                   | Bogs and marsh unclassified                                     | 544               | 0.44                  |
| 6                   | Rocky habitats                                     | Inlands rocks, screes and sands unclassified                    | 167               | 0.14                  |
| 8                   | Agricultural land and highly artificial landscapes | Agricultural land and highly artificial landscapes unclassified | 224               | 0.18                  |
| 16                  | Coastal and halophilic habitats                    | Coastal sand-dunes and sand beaches                             | 2474              | 2.01                  |
| 22                  | Non-marine waters                                  | Standing fresh water                                            | 139               | 0.11                  |
| 31                  | Scrub and grasslands                               | Heath and scrub                                                 | 1699              | 1.38                  |
| 32                  | Scrub and grasslands                               | Sclerophyllous scrub                                            | 109               | 0.09                  |
| 34                  | Scrub and grasslands                               | Dry calcareous grasslands and steppes                           | 3687              | 3.00                  |
| 35                  | Scrub and grasslands                               | Dry siliceous grasslands                                        | 424               | 0.35                  |
| 36                  | Scrub and grasslands                               | Alpine and subalpine grasslands                                 | 3406              | 2.77                  |
| 37                  | Scrub and grasslands                               | Humid grasslands and tall herb communities                      | 860               | 0.70                  |
| 38                  | Scrub and grasslands                               | Mesophile grassland                                             | 754               | 0.61                  |
| 41                  | Forests                                            | Broad-leaved deciduous forests                                  | 25289             | 20.58                 |
| 42                  | Forests                                            | Coniferous woodland                                             | 18008             | 14.66                 |
| 43                  | Forests                                            | Mixed woodland                                                  | 44525             | 36.24                 |
| 44                  | Forests                                            | Alluvial and very wet forests and brush                         | 3543              | 2.88                  |
| 45                  | Forests                                            | Broad-leaved evergreen woodland                                 | 179               | 0.15                  |
| 51                  | Bogs and marshes                                   | Raised bogs                                                     | 335               | 0.27                  |
| 53                  | Bogs and marshes                                   | Water-fringe vegetation                                         | 125               | 0.10                  |
| 54                  | Bogs and marshes                                   | Fens, transition mires and springs                              | 4877              | 3.97                  |
| 62                  | Rocky habitats                                     | Inland cliffs and exposed rocks                                 | 41                | 0.03                  |
| 81                  | Agricultural land and highly artificial landscapes | Improved grasslands                                             | 1834              | 1.49                  |
| 82                  | Agricultural land and highly artificial landscapes | Crops                                                           | 144               | 0.12                  |
| 83                  | Agricultural land and highly artificial landscapes | Orchards, groves and tree plantat                               | 250               | 0.20                  |
| 84                  | Agricultural land and highly artificial landscapes | Tree lines, hedges, small woods, bocage, parkland dehesa        | 129               | 0.10                  |
| 85                  | Agricultural land and highly artificial landscapes | Urban parks and large gardens                                   | 5335              | 4.34                  |

**Table S3:** List of French department and associated numbers of records deposited in Fongibase, area and density of observations.

| INSEE number | Name of department      | Number of records | Area  | Record density | Percentage deviation from national observations | Percentage deviation from national density |
|--------------|-------------------------|-------------------|-------|----------------|-------------------------------------------------|--------------------------------------------|
| 1            | Ain                     | 13,192            | 5,762 | 2.29           | 23.33                                           | 23.00                                      |
| 2            | Aisne                   | 13,795            | 7,362 | 1.87           | 28.96                                           | 0.67                                       |
| 3            | Allier                  | 9,694             | 7,340 | 1.32           | -9.38                                           | -29.05                                     |
| 4            | Alpes-de-Haute-Provence | 1,814             | 6,925 | 0.26           | -83.04                                          | -85.93                                     |
| 5            | Hautes-Alpes            | 1,444             | 5,549 | 0.26           | -86.50                                          | -86.02                                     |
| 6            | Alpes-Maritimes         | 3,834             | 4,299 | 0.89           | -64.16                                          | -52.09                                     |
| 7            | Ardèche                 | 5,054             | 5,529 | 0.91           | -52.75                                          | -50.89                                     |
| 8            | Ardennes                | 1,649             | 5,229 | 0.32           | -84.58                                          | -83.06                                     |
| 9            | Ariège                  | 7,074             | 4,890 | 1.45           | -33.87                                          | -22.28                                     |
| 10           | Aube                    | 19,336            | 6,004 | 3.22           | 80.76                                           | 73.02                                      |
| 11           | Aude                    | 1,362             | 6,139 | 0.22           | -87.27                                          | -88.08                                     |
| 12           | Aveyron                 | 3,217             | 8,735 | 0.37           | -69.93                                          | -80.21                                     |
| 13           | Bouches-du-Rhône        | 1,196             | 5,088 | 0.24           | -88.82                                          | -87.37                                     |
| 14           | Calvados                | 4,583             | 5,548 | 0.83           | -57.16                                          | -55.62                                     |
| 15           | Cantal                  | 8,221             | 5,726 | 1.44           | -23.15                                          | -22.87                                     |
| 16           | Charente                | 35,341            | 5,956 | 5.93           | 230.39                                          | 218.78                                     |
| 17           | Charente-Maritime       | 12,140            | 6,864 | 1.77           | 13.49                                           | -4.98                                      |
| 18           | Cher                    | 1,864             | 7,235 | 0.26           | -82.57                                          | -86.16                                     |
| 19           | Corrèze                 | 768               | 5,857 | 0.13           | -92.82                                          | -92.96                                     |
| 21           | Côte-d'Or               | 5,727             | 8,763 | 0.65           | -46.46                                          | -64.89                                     |
| 22           | Côtes-d'Armor           | 13,690            | 6,878 | 1.99           | 27.98                                           | 6.93                                       |
| 23           | Creuse                  | 1,632             | 5,565 | 0.29           | -84.74                                          | -84.24                                     |
| 24           | Dordogne                | 4,621             | 9,060 | 0.51           | -56.80                                          | -72.60                                     |
| 25           | Doubs                   | 75,227            | 5,233 | 14.38          | 603.26                                          | 672.32                                     |
| 26           | Drôme                   | 7,513             | 6,530 | 1.15           | -29.76                                          | -38.19                                     |
| 27           | Eure                    | 9,749             | 6,040 | 1.61           | -8.86                                           | -13.28                                     |
| 28           | Eure                    | 491               | 5,880 | 0.08           | -95.41                                          | -95.51                                     |
| 29           | Finistère               | 1,580             | 6,733 | 0.23           | -85.23                                          | -87.39                                     |
| 2A           | Corse-du-Sud            | 871               | 4,014 | 0.22           | -91.86                                          | -88.34                                     |
| 2B           | Haute-Corse             | 1,029             | 4,066 | 0.25           | -90.38                                          | -86.40                                     |
| 30           | Gard                    | 2,761             | 5,853 | 0.47           | -74.19                                          | -74.66                                     |
| 31           | Haute-Garonne           | 3,796             | 6,309 | 0.60           | -64.51                                          | -67.68                                     |
| 32           | Gers                    | 358               | 6,256 | 0.06           | -96.65                                          | -96.93                                     |
| 33           | Gironde                 | 1,399             | 9,976 | 0.14           | -86.92                                          | -92.47                                     |

|    |                      |        |       |       |        |        |
|----|----------------------|--------|-------|-------|--------|--------|
| 34 | Hérault              | 7,990  | 6,101 | 1.31  | -25.31 | -29.64 |
| 35 | Ille-et-Vilaine      | 1,556  | 6,775 | 0.23  | -85.45 | -87.66 |
| 36 | Indre                | 109    | 6,791 | 0.02  | -98.98 | -99.14 |
| 37 | Indre-et-Loire       | 1,749  | 6,127 | 0.29  | -83.65 | -84.66 |
| 38 | Isère                | 50,018 | 7,432 | 6.73  | 367.60 | 261.57 |
| 39 | Jura                 | 70,851 | 4,999 | 14.17 | 562.35 | 661.44 |
| 40 | Landes               | 2,432  | 9,243 | 0.26  | -77.26 | -85.86 |
| 41 | Loir-et-Cher         | 4,271  | 6,343 | 0.67  | -60.07 | -63.83 |
| 42 | Loire                | 15,732 | 4,781 | 3.29  | 47.07  | 76.78  |
| 43 | Haute-Loire          | 8,417  | 4,977 | 1.69  | -21.31 | -9.14  |
| 44 | Loire-Atlantique     | 25,971 | 6,809 | 3.81  | 142.79 | 104.92 |
| 45 | Loiret               | 4,977  | 6,775 | 0.73  | -53.47 | -60.53 |
| 46 | Lot                  | 1,252  | 5,217 | 0.24  | -88.30 | -87.11 |
| 47 | Lot-et-Garonne       | 125    | 5,361 | 0.02  | -98.83 | -98.75 |
| 48 | Lozère               | 853    | 5,167 | 0.17  | -92.03 | -91.13 |
| 49 | Maine-et-Loire       | 8,545  | 7,172 | 1.19  | -20.12 | -35.99 |
| 50 | Manche               | 952    | 5,938 | 0.16  | -91.10 | -91.39 |
| 51 | Marne                | 1,604  | 8,169 | 0.20  | -85.00 | -89.45 |
| 52 | Haute-Marne          | 2,162  | 6,211 | 0.35  | -79.79 | -81.30 |
| 53 | Mayenne              | 22,810 | 5,175 | 4.41  | 113.24 | 136.80 |
| 54 | Meurthe-et-Moselle   | 3,746  | 5,246 | 0.71  | -64.98 | -61.64 |
| 55 | Meuse                | 2,431  | 6,211 | 0.39  | -77.27 | -78.97 |
| 56 | Morbihan             | 2,254  | 6,823 | 0.33  | -78.93 | -82.25 |
| 57 | Moselle              | 3,600  | 6,216 | 0.58  | -66.35 | -68.89 |
| 58 | Nièvre               | 2,255  | 6,817 | 0.33  | -78.92 | -82.23 |
| 59 | Nord                 | 58,089 | 5,743 | 10.11 | 443.05 | 443.41 |
| 60 | Oise                 | 19,158 | 5,860 | 3.27  | 79.10  | 75.64  |
| 61 | Orne                 | 9,878  | 6,103 | 1.62  | -7.66  | -13.04 |
| 62 | Pas-de-Calais        | 78,199 | 6,671 | 11.72 | 631.05 | 529.77 |
| 63 | Puy-de-Dôme          | 10,565 | 7,970 | 1.33  | -1.23  | -28.78 |
| 64 | Pyrénées-Atlantiques | 2,575  | 7,645 | 0.34  | -75.93 | -81.90 |
| 65 | Hautes-Pyrénées      | 6,846  | 4,464 | 1.53  | -36.00 | -17.61 |
| 66 | Pyrénées-Orientales  | 12,698 | 4,116 | 3.09  | 18.71  | 65.74  |
| 67 | Bas-Rhin             | 3,138  | 4,755 | 0.66  | -70.66 | -64.55 |
| 68 | Haut-Rhin            | 6,153  | 3,525 | 1.75  | -42.48 | -6.22  |
| 69 | Rhône                | 15,204 | 3,249 | 4.68  | 42.14  | 151.41 |
| 70 | Haute-Saône          | 34,777 | 5,360 | 6.49  | 225.11 | 248.58 |
| 71 | Saône-et-Loire       | 1,285  | 8,575 | 0.15  | -87.99 | -91.95 |
| 72 | Sarthe               | 993    | 6,206 | 0.16  | -90.72 | -91.40 |
| 73 | Savoie               | 34,986 | 6,028 | 5.80  | 227.07 | 211.81 |
| 74 | Haute-Savoie         | 40,103 | 4,388 | 9.14  | 274.90 | 391.00 |
| 75 | Paris                | 818    | 105   | 7.79  | -92.35 | 318.54 |
| 76 | Seine-Maritime       | 23,710 | 6,278 | 3.78  | 121.65 | 102.90 |
| 77 | Seine-et-Marne       | 12,827 | 5,915 | 2.17  | 19.91  | 16.50  |

|    |                          |        |       |       |        |        |
|----|--------------------------|--------|-------|-------|--------|--------|
| 78 | Yvelines                 | 4,399  | 2,284 | 1.93  | -58.88 | 3.47   |
| 79 | Deux-Sèvres              | 7,563  | 5,999 | 1.26  | -29.30 | -32.27 |
| 80 | Somme                    | 10,580 | 6,170 | 1.71  | -1.09  | -7.88  |
| 81 | Tarn                     | 720    | 5,758 | 0.13  | -93.27 | -93.28 |
| 82 | Tarn-et-Garonne          | 369    | 3,718 | 0.10  | -96.55 | -94.67 |
| 83 | Var                      | 2,144  | 5,973 | 0.36  | -79.96 | -80.72 |
| 84 | Vaucluse                 | 1,448  | 3,567 | 0.41  | -86.46 | -78.19 |
| 85 | Vendée                   | 26,674 | 6,720 | 3.97  | 149.36 | 113.25 |
| 86 | Vienne                   | 48,874 | 6,990 | 6.99  | 356.90 | 275.64 |
| 87 | Haute-Vienne             | 909    | 5,520 | 0.16  | -91.50 | -91.15 |
| 88 | Vosges                   | 5,653  | 5,874 | 0.96  | -47.15 | -48.30 |
| 89 | Yonne                    | 2,693  | 7,427 | 0.36  | -74.82 | -80.52 |
| 90 | Territoire de<br>Belfort | 11,433 | 609   | 18.77 | 6.88   | 908.59 |
| 91 | Essonne                  | 6,697  | 1,804 | 3.71  | -37.39 | 99.44  |
| 92 | Hauts-de-Seine           | 497    | 176   | 2.82  | -95.35 | 51.71  |
| 93 | Seine-Saint-Denis        | 221    | 236   | 0.94  | -97.93 | -49.69 |
| 94 | Val-de-Marne             | 362    | 245   | 1.48  | -96.62 | -20.62 |
| 95 | Val-d'Oise               | 976    | 1,246 | 0.78  | -90.88 | -57.92 |

---



**Table S4:** List of the 25 most recorded taxa in Fongibase, including their lineage and trophic guild of belonging, and the corresponding number of records.

| Species                         | Phylum        | Ecological guilds | Number of records |
|---------------------------------|---------------|-------------------|-------------------|
| <i>Hypholoma fasciculare</i>    | Basidiomycota | Plant saprotroph  | 7,091             |
| <i>Amanita rubescens</i>        | Basidiomycota | Mutualist         | 6,413             |
| <i>Trametes versicolor</i>      | Basidiomycota | Wood saprotroph   | 5,915             |
| <i>Amanita citrina</i>          | Basidiomycota | Mutualist         | 5,716             |
| <i>Stereum hirsutum</i>         | Basidiomycota | Wood saprotroph   | 5,495             |
| <i>Russula cyanoxantha</i>      | Basidiomycota | Mutualist         | 5,266             |
| <i>Pluteus cervinus</i>         | Basidiomycota | Wood saprotroph   | 4,583             |
| <i>Mycena pura</i>              | Basidiomycota | Plant saprotroph  | 4,496             |
| <i>Laccaria amethystea</i>      | Basidiomycota | Mutualist         | 4,500             |
| <i>Lycoperdon perlatum</i>      | Basidiomycota | Plant saprotroph  | 4,475             |
| <i>Mycena galericulata</i>      | Basidiomycota | Wood saprotroph   | 4,125             |
| <i>Rhodocollybia butyracea</i>  | Basidiomycota | Plant saprotroph  | 4,121             |
| <i>Fomes fomentarius</i>        | Basidiomycota | Wood saprotroph   | 4,031             |
| <i>Amanita muscaria</i>         | Basidiomycota | Mutualist         | 4,021             |
| <i>Inocybe geophylla</i>        | Basidiomycota | Mutualist         | 3,890             |
| <i>Megacollybia platyphylla</i> | Basidiomycota | Plant saprotroph  | 3,890             |
| <i>Paxillus involutus</i>       | Basidiomycota | Mutualist         | 3,749             |
| <i>Collybia dryophila</i>       | Basidiomycota | Plant saprotroph  | 3,716             |
| <i>Infundibulicybe gibba</i>    | Basidiomycota | Plant saprotroph  | 3,690             |
| <i>Armillaria mellea</i>        | Basidiomycota | Plant saprotroph  | 3,576             |
| <i>Hymenopellis radicata</i>    | Basidiomycota | Plant saprotroph  | 3,501             |
| <i>Russula ochroleuca</i>       | Basidiomycota | Mutualist         | 3,483             |
| <i>Xylaria hypoxylon</i>        | Ascomycota    | Wood saprotroph   | 3,461             |
| <i>Fomitopsis betulina</i>      | Basidiomycota | Wood saprotroph   | 3,468             |
| <i>Clitocybe nebularis</i>      | Basidiomycota | Plant saprotroph  | 3,437             |

**Table S5:** Detail of the number of deposited fungal records in FongiBase in relation to their belonging to ecological guilds according to FunGuild.

| Ecological guilds | Number of records | Percentage of records |
|-------------------|-------------------|-----------------------|
| Animal parasite   | 753               | 0.08                  |
| Animal saprotroph | 51                | 0.01                  |
| Bryotrophic       | 5642              | 0.61                  |
| Carbonicolous     | 294               | 0.03                  |
| Dung saprotroph   | 6550              | 0.71                  |
| Endophyte         | 2897              | 0.32                  |
| Epiphyte          | 53                | 0.01                  |
| Fungal parasite   | 8804              | 0.96                  |
| Mutualist         | 409643            | 44.64                 |
| Plant parasite    | 26631             | 2.90                  |
| Plant saprotroph  | 289921            | 31.59                 |
| Wood saprotroph   | 166402            | 18.13                 |

Figure S1

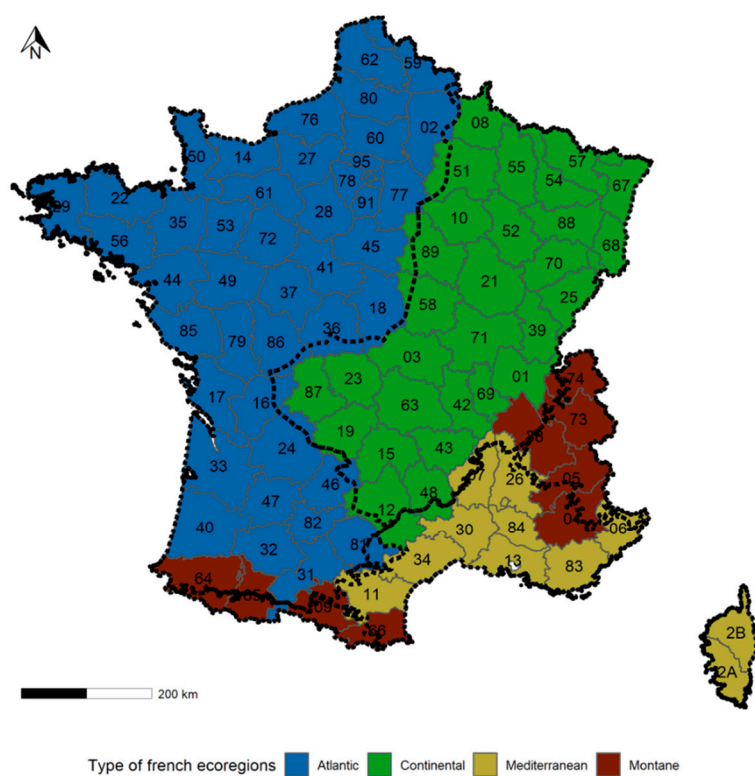

**Figure S2**

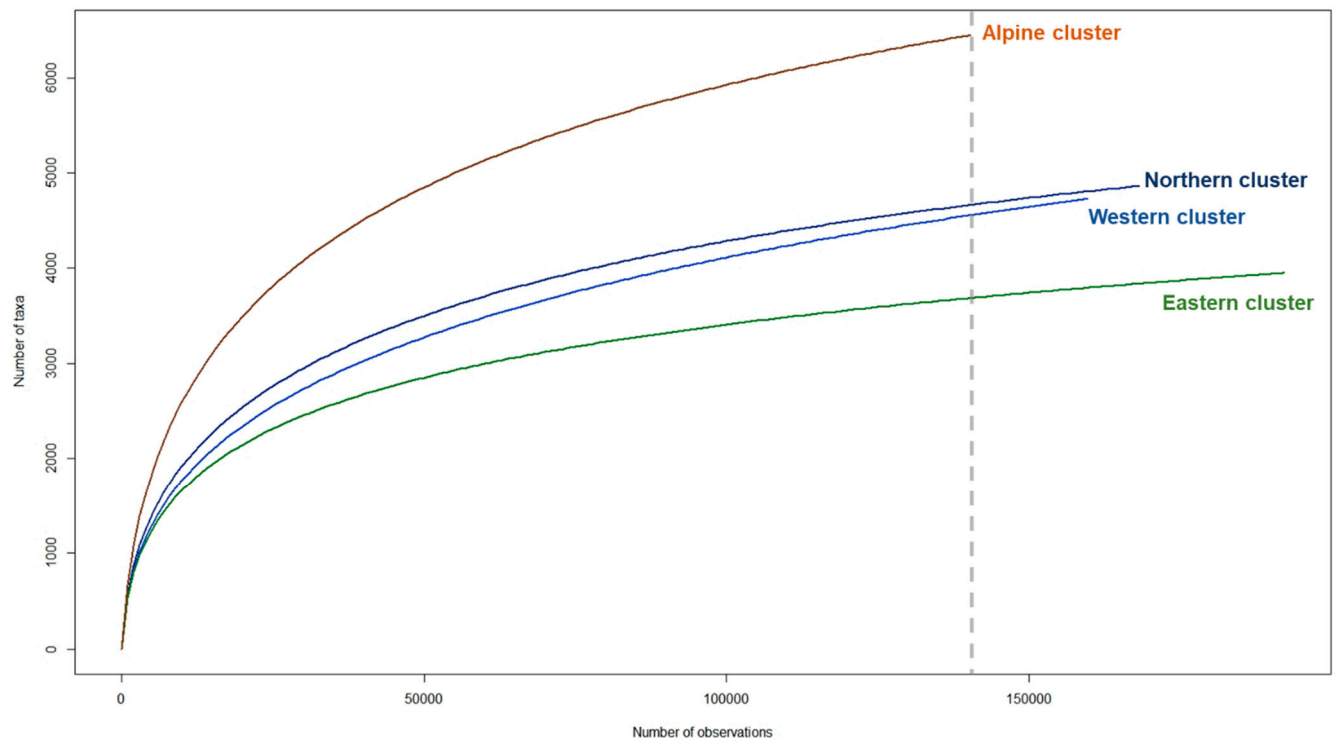

**Figure S3**

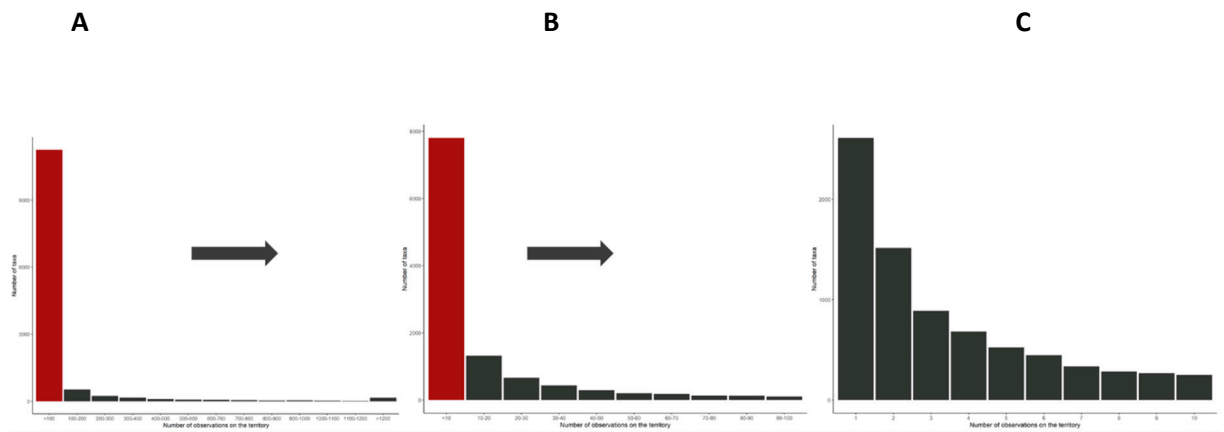

**Figure S3.** Distribution of taxa based on their occurrence in the database, ordered by observation classes using **A.** multiples of 100 records **B.** for taxa with less than 100 records (red bar in panel A), multiples of 10 records and **C.** for taxa with less than 10 records (red bar in panel B) detailed distribution per each frequency.

Figure S4

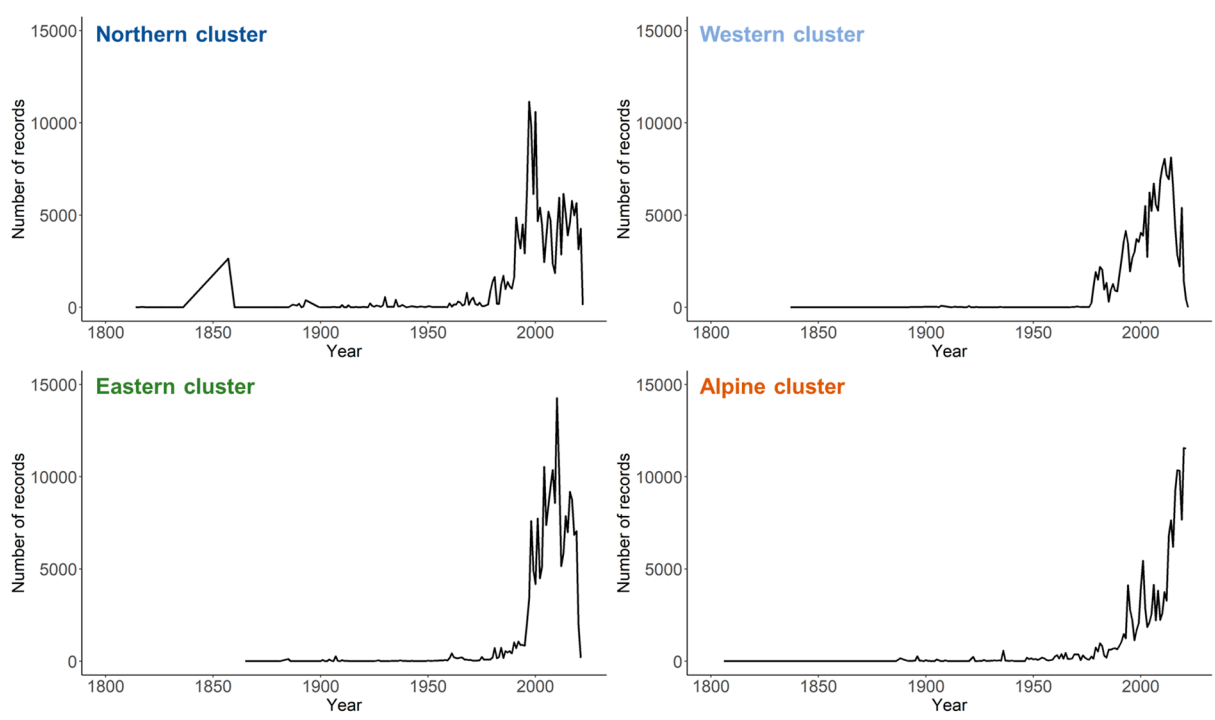

Supplement: s1 [file s1]
